1 **Interactive effect matters: a combination of herbivory degree and**  
2 **the ratio of generalist to specialist better predicts evolution of plant**  
3 **defense**

4

5 Yuanfei Pan<sup>1,2</sup>, Xiaoyun Pan<sup>1\*</sup>, Lucas Del Bianco Faria<sup>3</sup>, Bo Li<sup>1</sup>

6

7 *<sup>1</sup>Ministry of Education Key Laboratory for Biodiversity Science and Ecological Engineering,*  
8 *Coastal Ecosystems Research Station of the Yangtze River Estuary, Fudan University,*  
9 *Shanghai China*

10 *<sup>2</sup>School of Public Health, Fudan University, Shanghai China*

11 *<sup>3</sup>Department of Ecology and Conservation, Institute of Natural Sciences, Federal University*  
12 *of Lavras (UFLA), Lavras, Brazil*

13

14 *\*Correspondence author: [xypan@fudan.edu.cn](mailto:xypan@fudan.edu.cn)*

15

16 ***Word count:*** main text in total 3290 words, summary 144 words, introduction 826 words,  
17 description 1020 words, results 219 words, discussion 1066 words.

18 ***Main text:*** 3 figures (colored) and 1 table.

19 ***Supplementary materials:*** 2 figures and 1 table.

## 20 **Abstract**

21 Herbivory degree and the ratio of generalist to specialist herbivores have long been treated  
22 as two important but independent factors in shaping the evolution of plant defense. However,  
23 this assumption of independency is poorly supported and has resulted in great controversy in  
24 explaining the patterns of plant defense. Here we investigated the possible interaction between  
25 herbivory degree and generalist-to-specialist ratio using a cost-benefit model of defense  
26 evolution in plants. Our results showed that, with increasing generalist herbivore proportion,  
27 plant defense investment increases when herbivory degree is low and decreases when herbivory  
28 degree is high. These results provide the first theoretical support for the interactive effect of  
29 herbivory degree and ratio of generalist/specialist affecting plant defense, which integrate  
30 many of the previous results (e.g. latitudinal patterns of plant defense and defense evolution of  
31 invasive plants) and put them into a more general theoretical context.

32

33 **Keywords:** evolution of herbivore defense, natural selection, plant–herbivore interactions,  
34 specialist-generalist paradigm, biogeography

## 35 **Introduction**

36 Plants have evolved a variety of strategies to defend against herbivores. These strategies  
37 include secondary metabolites (such as phenols, flavonoids, terpenes and alkaloids), as well as  
38 physical traits (such as spines, thorns, and trichomes) (Fritz & Simms 1992). Since herbivore  
39 damage may lead to significant loss in plant fitness, it is expected that natural selection should  
40 favor high levels of defense (Marquis, 1984, 1992). However, numerous studies have found  
41 the existence of intermediate levels of plant defense with substantial variations both among and  
42 within plant species (Rausher & Simms, 1989; Vrieling *et al.*, 1993; Mauricio & Rausher,  
43 1997). These patterns support the idea that selection from herbivores on plant defense may vary  
44 in both direction and strength and thus there could be trade-offs in shaping the evolution of  
45 plant defenses. Studies that tried to explain interspecific or intraspecific variation in plant  
46 defense largely fall into two categories.

47 On one hand, the optimal defense hypothesis (ODH, McKey 1974, 1979; Rhoades 1979;  
48 Stamp 2003) explains these patterns with an elegant cost-benefit analysis. It assumes that plant  
49 allocates to defense in proportion to the herbivory degree it is suffering and plant defense is costly,  
50 thus an intermediate level of defense will be favored. Many prominent hypotheses have  
51 incorporated the idea from the ODH. For example, the evolution of increased competitive  
52 ability hypothesis (EICA, Blossey & Nötzold 1995) predicts that invasive plants should evolve  
53 a low level of defense as a result of being released from natural enemies in their introduced  
54 range. The latitudinal herbivory-defense hypothesis (LHDH, Coley & Aide 1991) posits that  
55 herbivory degree and plant defenses increase toward lower latitudes. A substantial body of  
56 recent studies testing EICA or LHDH have provided contradictory evidences (EICA: Handley  
57 *et al.* 2008; Chun *et al.* 2010; Felker-Quinn *et al.* 2013; LHDH: Moles *et al.* 2011a, b). This is  
58 indicating that besides herbivory degree there should be other factors that influence  
59 biogeographic patterns of plant defense.

60 On the other hand, many studies have suggested that generalist (feed on many different  
61 plant species) and specialist herbivores (feed on a restricted set of related plant species) may  
62 exert opposing selections on plant defense. Typically generalist herbivores are effectively

63 deterred by high concentrations of defense chemicals (Cornell & Hawkins, 2003; Ali &  
64 Agrawal, 2012), while some specialist herbivores have evolved to utilize plant chemicals as  
65 oviposition cues or feeding stimulants (Macel & Vrieling, 2003; Nieminen *et al.*, 2003).  
66 Several specialists even sequester such chemicals and use them for their own defense against  
67 natural enemies (Lankau, 2007; Ali & Agrawal, 2012; Züst *et al.*, 2018). This contrasting effect  
68 of generalist and specialist on plant defense has attracted some theoretical attention over the  
69 last century (van der Meijden, 1996) and a few empirical studies tested some of the predictions  
70 made by these theoretical analyses (Lankau, 2007; Liu *et al.*, 2018; Zhang *et al.*, 2018). Thus,  
71 besides herbivory degree, variation in herbivore composition (e.g. the ratio of specialist to  
72 generalist herbivores) through space and time could be another important factor for  
73 maintenance of genetic variation in defensive traits. In some extreme cases, if specialist  
74 herbivores are absent, as is the case with some introduced plant species in their introduced  
75 range, selection may lead to rapid increases in the levels of chemical defense (shifting defense  
76 hypothesis, SDH, Müller-Schärer *et al.* 2004; Joshi & Vrieling 2005; Zhang *et al.* 2018).

77 In summary, herbivory degree (e.g. the total leaf herbivory) and the ratio of generalist to  
78 specialist have long been treated as two important but independent factors in shaping the  
79 evolution of plant defense. Reasons for such a knowledge gap could be twofold. Theoretically,  
80 the graphical model by van der Meijden (1996) simply assumed that herbivory degree to a non-  
81 defended plant genotype is fixed, so that this theoretical study could not explore such  
82 interaction. And technically, in order to detect such interaction with experiments, a response-  
83 surface design with treatment gradient of both herbivore degree and the ratio of generalist to  
84 specialist is needed (e.g. Fig. 1a). But conducting such experiments is labor-intensive.

85 Here, we test the hypothesis that herbivory degree and the ratio of generalist to specialist  
86 herbivores interact on the evolution of plant defense (Fig. 1). Specifically, we predict that with  
87 increasing proportion of generalist herbivores plant defense should increase when herbivory  
88 degree is low; while decrease when herbivory degree is high. To do so, we first use a simple  
89 model to formalize the notion of the interaction between herbivory degree and the ratio of  
90 generalist to specialist herbivores on plant defense and derive a metric essential for quantifying

91 the relative levels of herbivory. We then explore and illustrate a series of scenarios to predict  
92 the pattern of optimal plant defense as a result of interactive effect of change in both herbivory  
93 degree and generalist proportion. Lastly, we show how our model relates to a much larger body  
94 of works on the geographical pattern of plant defense and herbivory and them can be put into  
95 our general theoretical framework.

96

## 97 **Methods**

98 We proposed a modified model for the evolution of plant defense against generalist and  
99 specialist herbivores extended from a classic cost-benefit model of plant defense (Lankau,  
100 2007). The general form of this model is as follows:

$$101 \quad W = W_0 + B(\gamma) - C(\gamma) \quad (1)$$

102 where  $W$  is the fitness of plant,  $\gamma$  is the level of plant defense investment,  $W_0$  is the fitness  
103 of a non-defended plant genotype with no defense investment,  $B(\gamma)$  is the increase in plant  
104 fitness related to benefits of defense investment, and  $C(\gamma)$  is the decrease in plant fitness due  
105 to cost of defense investment. It is assumed that plant gains benefit from defense by reducing  
106 the herbivory degree it is suffering, and thus  $B(\gamma)$  is substituted by  $-H(\gamma)$ , in which  $H(\gamma)$   
107 represents for the realized herbivory damage given certain level of plant defense investment:

$$108 \quad W = W_0 - H(\gamma) - C(\gamma) \quad (2)$$

109 Plant defense investment  $\gamma$  in this model is assumed to be normalized, so its value ranges from  
110  $0 \leq \gamma \leq 1$ .

111 We then make further assumptions regarding the characteristic of herbivory and cost  
112 functions of plant defense investment.

### 113 **Assumptions and empirical background**

114 **Firstly**, generalist herbivores are assumed to be more affected by given levels of plant  
115 defense than specialist herbivores (Bergelson *et al.*, 2001; Cornell & Hawkins, 2003; Ali &  
116 Agrawal, 2012). This assumption is modeled as relative convexity and slope of herbivory  
117 curves of generalist and specialist as below (i.e. magnitude of shape and slope parameters in  
118 Eq.3 and Eq.4).

119 The herbivory damage by generalist herbivore is formulated as:

$$120 \quad H_g(\gamma) = h_g N p (1 - s_g \gamma^a) \quad (3)$$

121 The  $h_g N p$  term describes herbivory damage by generalists in absence of plant defense, where  
122  $h_g$  is the herbivory damage by a single generalist to a non-defended plant genotype,  $p$  is the  
123 generalist proportion among herbivores, and  $N p$  represents for population density of  
124 generalist herbivores. The  $(1 - s_g \gamma^a)$  term describes feeding rate of generalist herbivores as  
125 a decreasing function of plant defense investment, in which  $s_g$  is a slope parameter and  $a$  is  
126 a shape parameter, both describe how feeding rate decrease per unit defense investment.

127 The herbivory damage by specialist herbivore is formulated as:

$$128 \quad H_s(\gamma) = h_s N (1 - p) (1 - s_s \gamma^b + k \gamma) \quad (4)$$

129 where  $h_s$  is the herbivory damage by a single specialist to a non-defended plant genotype,  
130  $1 - p$  is the specialist proportion among herbivores, and  $N(1 - p)$  represents for population  
131 density of specialist herbivores. In the feeding rate term,  $s_s$  and  $b$  are the slope and shape  
132 parameter respectively. The extra term  $k \gamma$  describes the increase in specialist feeding rate  
133 when plant defense attracts specialist herbivore (e.g. defensive chemicals act as cue for  
134 oviposition or feeding simulants). If  $k > 0$ , herbivory damage by specialists increase with  
135 plant defense and peak at intermediate level (shape like a quadratic function), which represents  
136 for the case where specialist is attracted by plant defense. If  $k = 0$ ,  $H_s(\gamma)$  decrease  
137 monotonically, corresponding to the case which specialist are not attracted.

138 To model the different responses of generalist and specialist to given levels of plant  
139 defense (e.g. specialists are more resistant to plant defense than generalists), we assumed that  
140 slope and shape parameters should satisfy either  $b > a$  or  $s_s < s_g$  or  $k > 0$ . The condition  
141  $b > a$  implies that herbivory curve of specialist is more convex than generalist; the condition  
142  $s_s < s_g$  states that herbivory curve of specialist is flatter than generalist; and the condition  $k >$   
143  $0$  states that specialists are attracted by plant defense while generalists are deterred.

144 For simplicity, we further assumed the herbivory damage to non-defended plant by a single  
145 generalist and specialist are equal, namely  $h_g = h_s = h_0$ . Then the total herbivory damage by  
146 both generalist and specialist to non-defended plant can be expressed as  $H_0 = h_0 N = h_g N p +$

147  $h_s N(1 - p)$ . Here  $H_0$  represents for the maximal fitness loss due to overall herbivory damage,  
148 which we named as “ideal herbivory damage”. On the contrary,  $H(\gamma)$  in Eq. 2 is “realized  
149 herbivory damage”. In the later discussion part, we will use ideal herbivory to represent for  
150 local gradient of herbivory degree to make predictions rather than using realized herbivory,  
151 because realized herbivory itself is coupled with defense level of plant and many other factors.  
152 We will also explore the condition where  $h_g \neq h_s$  in the supplementary materials and we will  
153 illustrate that major outcomes hold true for such case.

154 **Secondly**, defense cost is assumed to increase monotonically with defense investment.  
155 This assumption is represented by the following relationships between costs and defense  
156 investment:

$$157 \quad C(\gamma) = s_c \gamma^c \quad (5)$$

158 where  $s_c$  is a slope parameter and it also denotes the maximal allocation cost of a plant as  
159  $C(1) = s_c$ .  $c$  is the shape parameter of cost function. Some empirical evidence regarding the  
160 shape of cost functions has lead previous models to assume that cost function is linear  
161 (Bergelson *et al.*, 2001). However, resent study have revealed that nonlinear cost functions may  
162 be more common than previously expected. For instance, a previous study showed that cost  
163 function of defense (i.e., estimated as reduced growth) can vary from being almost linear to  
164 being a concave upward function of defense investment (Skogsmyr & Fagerström, 1992). In  
165 our model, we examine the cases of linear cost function ( $c = 1$ ), convex cost function ( $0 <$   
166  $c < 1$ ) and concave cost function ( $c > 1$ ).

167 In summary, the complete expression of the model is as follows:

$$168 \quad W(\gamma) = W_0 - H_0 p(1 - s_g \gamma^a) - H_0(1 - p)(1 - s_s \gamma^b + k\gamma) - s_c \gamma^c \quad (6)$$

### 169 **Detecting the interaction between herbivory degree and generalist proportion**

170 The goal of model evaluation is to find out the conditions where interactive effect on  
171 optimal defense level exist between herbivory degree and the ratio of generalist to specialist.  
172 To do so, we numerically resolved for optimal defense level  $\gamma^* = \operatorname{argmax}_{\gamma \in [0,1]} W(\gamma)$  and partial  
173 derivatives of optimal defense  $\frac{\partial \gamma^*}{\partial H_0}$  and  $\frac{\partial \gamma^*}{\partial p}$ . If the interactive effect exists, we expect  $\frac{\partial \gamma^*}{\partial p}$  (or

174  $\frac{\partial \gamma^*}{\partial H_0}$ ) to have different sign given high and low  $H_0$  (or  $p$ ). On the contrary, if there is no  
175 interactive effect,  $\frac{\partial \gamma^*}{\partial p}$  (or  $\frac{\partial \gamma^*}{\partial H_0}$ ) should always be positive or negative regardless of  $H_0$  (or  $p$ )  
176 value.

177 Technically, optimal defense level  $\gamma^*$  was calculated by evaluating  $\gamma^* = \underset{\gamma \in [0,1]}{\operatorname{argmax}} W(\gamma)$   
178 given  $\gamma$  in a predefined discrete range (see Table S1). And the partial derivatives  $\frac{\partial \gamma^*}{\partial H_0}$  and  $\frac{\partial \gamma^*}{\partial p}$   
179 were approximated by discrete expressions  $\frac{\Delta \gamma^*}{\Delta H_0} = \gamma^*(H_0 + \Delta H_0, p) - \gamma^*(H_0, p)$  and  $\frac{\Delta \gamma^*}{\Delta p} =$   
180  $\gamma^*(H_0, p + \Delta p) - \gamma^*(H_0, p)$ , where  $\Delta H_0$  and  $\Delta p$  are simulation intervals (see Table S1). We  
181 repeated the above calculations for each set of parameters in orthogonal combinations of all  
182 parameter values in their predefined range (Table S1), so that we can find the conditions where  
183 interactive effect on optimal defense level exist.

184

## 185 Results

186 We found the effect of generalist proportion on the optimal levels of plant defense depends  
187 on herbivory degree (Fig. 2). Specifically, herbivory degree is divided by a threshold  
188 (formulated as  $H_T$ ,  $H_T = \frac{cs_c}{as_g} \gamma_0^{c-a}$  where  $\gamma_0$  is the solution to equation  $as_g \gamma^{a-1} =$   
189  $bs_s \gamma^{b-1} - k$ ) into low and high. When herbivory degree is high ( $H_0 \geq H_T$ ), increase in  
190 generalist proportion leads to decrease in optimal defense level ( $\Delta \gamma^* / \Delta p \leq 0$ ); and when  
191 herbivory degree is low ( $H_0 < H_T$ ), increase in generalist proportion leads to increase in  
192 optimal defense level ( $\Delta \gamma^* / \Delta p > 0$ ). The above result indicates that herbivory degree and the  
193 ratio of generalist to specialist do have an interactive effect on the optimal defense level.

194 We found concave cost function ( $c > 1$ , marginal defense cost increases as defense level  
195 increases) is necessary for the existence of interaction (Fig. S1). And in the case of concave  
196 cost function,  $bs_s - as_g > k$  is a sufficient condition for the interactive effect to exist. The  
197 above expression states that in case  $k = 0$  (i.e. plant defense deters specialists), whenever  
198 specialists are more resistant to plant defense than generalists, there should be an interactive  
199 effect between herbivory degree and generalist proportion; and in case  $k > 0$  (i.e. plant



200 defense attracts specialists), it states that attraction effect should be no more than the difference  
201 in resistance to plant defense between specialist and generalist for the interactive effect to exist.

202

## 203 **Discussion**

204 Although herbivory degree and generalist-to-specialist ratio have long been seen as  
205 important factors driving defense evolution in plants, they were typically treated as independent  
206 by presumption, which might have led to great controversy in related studies. Our results  
207 provide the first theoretical support for the interactive effect of herbivory degree and generalist  
208 proportion on evolution of plant defense, which integrate many previous studies (Table 1) and  
209 put them into a general theoretical context (Fig. 3). In the following discussion, we demonstrate  
210 how our interactive framework may help empiricists to resolve debates in two specific areas:  
211 latitudinal patterns of plant defense and defense evolution of invasive plants.

### 212 **Implication for latitudinal patterns of plant defense**

213 Latitudinal pattern of plant-herbivore interaction is one of the most fascinating but  
214 unresolved issues in biogeography. The most studied latitudinal herbivory-defense hypothesis  
215 (LHDH) predicted decreased defense towards higher latitude solely based on reduced  
216 herbivory degree (Coley & Aide 1991). We point out that ignoring the interactive effect of  
217 herbivory degree and generalist proportion could lead to confusion, so that many studies in the  
218 recent decade have provided conflicting results (Moles *et al.* 2011a, b; Anstett *et al.* 2016).

219 For example, a recent case study reported increased herbivory degree at higher latitude,  
220 and in the meanwhile concentration of major defensive substances declined (Anstett *et al.*,  
221 2015), which conflicts with the prediction of the LHDH. While we found in this case, slope of  
222 latitude-versus-herbivore-abundance curve was greater for specialist than generalist, indicating  
223 a shift towards lower generalist proportion at higher latitude, and this is supported by a related  
224 study of the same author (Anstett *et al.*, 2014). Given the herbivory degree in this case kept in  
225 relatively low level, lower generalist proportion in high latitude should select for lower defense.

226 Moreover, our interactive framework is able to capture almost all possible latitudinal  
227 patterns of plant defense that have been reported to date (Moles *et al.* 2011a; Anstett *et al.* 2015,

228 and also see Fig. S2). Thus, we propose that combining herbivory degree and generalist  
229 proportion in future studies can be a good start point to merge divergent patterns into an unified  
230 framework. A growing number of studies consistently show that diet breath of herbivore insects  
231 shift globally towards a higher frequency of specialist insects at lower latitude (Novotny *et al.*,  
232 2002; Dyer *et al.*, 2007; Forister *et al.*, 2015). Current and coming evidences on gradients of  
233 generalist-to-specialist ratio should push future studies to pay more attention on combining the  
234 herbivory degree and generalist-to-specialist ratio when studying latitudinal herbivory-defense  
235 patterns.

### 236 **Implication for defense evolution in invasive plants**

237 Herbivory degree and the ratio of generalist to specialist have also been seen as important  
238 factors in shaping the evolution of defense in invasive plants. However, many previous theories  
239 treat them as separate factors and thus making conflicting predictions. For example, the  
240 evolution of increased competitive ability (EICA) hypothesis predicted reduce in defense level  
241 based on less herbivore pressure in plants' introduced ranges (Blossey & Nötzold 1995). While  
242 the shifting defense hypothesis (SDH) predicted increase in some specific defense traits against  
243 generalist in introduced range due to increased generalist proportion (Müller-Schärer *et al.*  
244 2004; Joshi & Vrieling 2005).

245 Our interactive model reveals the conditions where the EICA hypothesis or SDH can be  
246 applied and thus integrates them into an unified framework (Table 1): if herbivory degree in  
247 native and introduced range are both weak, then the EICA fits in the cases where decrease in  
248 herbivory degree is sharper then increase in generalist proportion and the SDH fits in  
249 complementary cases where increase in generalist proportion outweighs the decrease in  
250 herbivory degree (see the example shown in Fig. 3). If herbivory degree are both high, then  
251 decrease in herbivory degree and increase in generalist proportion in combination will  
252 consistently select for reduced defense level as predicted by the EICA hypothesis and the SDH  
253 could not fit into the high herbivory degree scenario. These conditions are consistent with  
254 general conclusions of a recent meta-analysis (Zhang *et al.* 2018).

### 255 **Future Directions**

256 The interaction between herbivory degree and generalist proportion is largely unexpected  
257 by previous studies, but we suspect it can be ubiquitous. Theoretically, such interaction  
258 between herbivory degree and generalist proportion roots in the nonlinearity of the marginal  
259 benefits of plant defense. As shown in our conceptual diagram (Fig. 1), the marginal benefit  
260 curve of generalist intersects that curve of specialist, meaning that defending against generalists  
261 is more efficient than defending against specialists given high level of defense, while less  
262 efficient given low level of defense. As defense level covaries with herbivory degree, it is  
263 reasonable to expect the existence of interaction between herbivory degree and generalist  
264 proportion when defense benefits are nonlinear and unidentical. Many studies support the  
265 nonlinear and unidentical assumption (Bergelson *et al.*, 2001; Lankau, 2007), so we suspect  
266 that such interaction could be prevalent. For example, a review paper by Bergelson *et al.* (2001)  
267 enumerated eight examples of damage-by-herbivore-versus-plant-resistant plots, and all this  
268 cases support nonlinearity in benefit of plant defense against herbivores.

269 Empirically, no controlled experiment has directly detected the predicted interaction  
270 between herbivory degree and generalist-to-specialist ratio, but some field observations  
271 provide indirect evidence for evidence for the interaction (see cases in Table 1). We call for  
272 more attention on finely designed experiments that manipulating gradients of herbivory degree  
273 and the ratio of generalist to specialist simultaneously to test for the interactive effect. Using  
274 well documented observations in the field can be an alternative way of testing, and for example  
275 invasive plants or widely distributed species across latitudes can be suitable materials.

276 We note that our study still has some limitations, which will direct our future works. We  
277 applied an optimization approach, which features in its simplicity and is usually sufficient to  
278 model systems at equilibrium. However, optimization models may be less predictive in a  
279 dynamic time scale. Future works will focus on understanding the evolutionary dynamics of  
280 defense in the light of the ecological feedbacks that are intrinsic to the interaction of plant and  
281 herbivores (Lankau, 2007).

282

## 283 **Conclusion**

284 Our model of the interaction between herbivory degree and generalist proportion suggests  
285 that considering these factors simultaneously can improve predictions of plant defense levels.  
286 This model provides a general theoretical framework for analysis of genetically based  
287 intraspecific variation of plant defense level, helps to explain previous experimental results,  
288 and has important implications for the biogeography of plant defense and the evolution of  
289 defense in invasive plants.

290

## 291 **Acknowledgements**

292 This work is supported by Hui-Chun Chin and Tsung-Dao Lee Chinese Undergraduate  
293 Research Endowment (grant No. 17929 to YP), and National Natural Science Foundation of  
294 China (grant No. 41771053 to XP). We thank Shurong Zhou, Ingrid Parker, Dana Blumenthal,  
295 Mu Liu and Xiang Liu for their comments and advices on early draft of this manuscript.

296

## 297 **Author contributions**

298 Y.P. and X.P. conceived the ideas. Y.P. conducted modeling and simulation. Y.P. wrote the  
299 paper with major inputs from X.P., L.D.B.F. and B.L..

300

## 301 **Code availability**

302 All codes and scripts in this work are available on GitHub repository  
303 ([https://github.com/Augustpan/Defense\\_Evo\\_Model](https://github.com/Augustpan/Defense_Evo_Model)).

304

## 305 **References**

306 **Ali JG, Agrawal AA. 2012.** Specialist versus generalist insect herbivores and plant defense.  
307 *Trends in Plant Science* **17**: 293–302.

308 **Andrew NR, Hughes L. 2005.** Herbivore damage along a latitudinal gradient: relative  
309 impacts of different feeding guilds. *Oikos* **108**: 176–182.

310 **Anstett DN, Ahern JR, Glinos J, Nawar N, Salminen J-P, Johnson MTJ. 2015.** Can  
311 genetically based clines in plant defence explain greater herbivory at higher latitudes? (T  
312 Turlings, Ed.). *Ecology Letters* **18**: 1376–1386.

- 313 **Anstett DN, Naujokaitis-Lewis I, Johnson MTJ. 2014.** Latitudinal gradients in herbivory  
314 on *Oenothera biennis* vary according to herbivore guild and specialization. *Ecology* **95**:  
315 2915–2923.
- 316 **Anstett DN, Nunes KA, Baskett C, Kotanen PM. 2016.** Sources of Controversy  
317 Surrounding Latitudinal Patterns in Herbivory and Defense. *Trends in Ecology & Evolution*  
318 **31**: 789–802.
- 319 **Bergelson J, Greg Dwyer A, Emerson JJ. 2001.** Models and Data on Plant-Enemy  
320 Coevolution. *Annual Review of Genetics* **35**: 469–499.
- 321 **Blair AC, Wolfe LM. 2004.** The evolution of an invasive plant: an experimental study with  
322 *silene latifolia*. *Ecology* **85**: 3035–3042.
- 323 **Blossey B, Nötzold R. 1995.** Evolution of Increased Competitive Ability in Invasive  
324 Nonindigenous Plants: A Hypothesis. *The Journal of Ecology* **83**: 887.
- 325 **Chun YJ, Van Kleunen M, Dawson W. 2010.** The role of enemy release, tolerance and  
326 resistance in plant invasions: linking damage to performance: Invasive plants and enemy  
327 release. *Ecology Letters*: no-no.
- 328 **Coley PD, Aide TM. 1991.** Comparison of herbivory and plant defenses in temperate and  
329 tropical broad-leaved forests. In: Plant- Animal Interaction: Evolutionary Ecology in Tropical  
330 and Temperate Regions. New York: Wiley, 25–49.
- 331 **Cornell HV, Hawkins BA. 2003.** Herbivore Responses to Plant Secondary Compounds: A  
332 Test of Phytochemical Coevolution Theory. *The American Naturalist* **161**: 507–522.
- 333 **Cripps MG, Hinz HL, McKenney JL, Price WJ, Schwarzländer M. 2009.** No evidence  
334 for an ‘evolution of increased competitive ability’ for the invasive *Lepidium draba*. *Basic and*  
335 *Applied Ecology* **10**: 103–112.
- 336 **Cripps MG, Schwarzländer M, McKenney JL, Hinz HL, Price WJ. 2006.**  
337 Biogeographical comparison of the arthropod herbivore communities associated with  
338 *Lepidium draba* in its native, expanded and introduced ranges. *Journal of Biogeography* **33**:  
339 2107–2119.
- 340 **Dyer LA, Singer MS, Lill JT, Stireman JO, Gentry GL, Marquis RJ, Ricklefs RE,**  
341 **Greeney HF, Wagner DL, Morais HC, et al. 2007.** Host specificity of Lepidoptera in  
342 tropical and temperate forests. *Nature* **448**: 696–699.
- 343 **Elzinga JA, Bernasconi G. 2009.** Enhanced frugivory on invasive *Silene latifolia* in its  
344 native range due to increased oviposition. *Journal of Ecology* **97**: 1010–1019.

- 345 **Felker-Quinn E, Schweitzer JA, Bailey JK. 2013.** Meta-analysis reveals evolution in  
346 invasive plant species but little support for Evolution of Increased Competitive Ability  
347 (EICA). *Ecology and Evolution* **3**: 739–751.
- 348 **Forister ML, Novotny V, Panorska AK, Baje L, Basset Y, Butterill PT, Cizek L, Coley**  
349 **PD, Dem F, Diniz IR, et al. 2015.** The global distribution of diet breadth in insect  
350 herbivores. *Proceedings of the National Academy of Sciences* **112**: 442–447.
- 351 **Handley RJ, Steinger T, Treier UA, Müller-Schärer H. 2008.** Testing the evolution of  
352 increased competitive ability (EICA) hypothesis in a novel framework. *Ecology* **89**: 407–417.
- 353 **Hinz HL, Schwarzländer M, McKenney JL, Cripps MG, Harmon B, Price WJ. 2012.**  
354 Biogeographical comparison of the invasive *Lepidium draba* in its native, expanded and  
355 introduced ranges. *Biological Invasions* **14**: 1999–2016.
- 356 **Joshi J, Vrieling K. 2005.** The enemy release and EICA hypothesis revisited: incorporating  
357 the fundamental difference between specialist and generalist herbivores: Evolutionary change  
358 in invasive ragwort. *Ecology Letters* **8**: 704–714.
- 359 **Lankau RA. 2007.** Specialist and generalist herbivores exert opposing selection on a  
360 chemical defense. *New Phytologist* **175**: 176–184.
- 361 **Liu M, Zhou F, Pan X, Zhang Z, Traw MB, Li B. 2018.** Specificity of herbivore-induced  
362 responses in an invasive species, *Alternanthera philoxeroides* (alligator weed). *Ecology and*  
363 *Evolution* **8**: 59–70.
- 364 **Macel M, Vrieling K. 2003.** Pyrrolizidine alkaloids as oviposition stimulants for the  
365 cinnabar moth, *Tyria jacobaeae*. *Journal of Chemical Ecology* **29**: 1435–1446.
- 366 **Maron JL, Vilà M, Arnason J. 2004.** Loss of enemy resistance among introduced  
367 populations of st. John’s wort (*hypericum perforatum*). *Ecology* **85**: 3243–3253.
- 368 **Marquis RJ. 1984.** Leaf Herbivores Decrease Fitness of a Tropical Plant. *Science* **226**: 537–  
369 539.
- 370 **Marquis RJ. 1992.** The selective impact of herbivores. *Plant resistance to herbivores and*  
371 *pathogens: ecology, evolution, and genetics*. University of Chicago Press, Chicago: 301–325.
- 372 **Mauricio R, Rausher MD. 1997.** Experimental manipulation of putative selective agents  
373 provides evidence for the role of natural enemies in the evolution of plant defense. *Evolution*  
374 **51**: 1435–1444.
- 375 **McKey D. 1974.** Adaptive Patterns in Alkaloid Physiology. *The American Naturalist* **108**:  
376 305–320.

- 377 **McKey D. 1979.** The distribution of secondary compounds within plants. *Herbivores-their*  
378 *interaction with secondary plant metabolites*: 55–134.
- 379 **van der Meijden E. 1996.** Plant defence, an evolutionary dilemma: Contrasting effects of  
380 (specialist and generalist) herbivores and natural enemies. *Entomologia Experimentalis Et*  
381 *Applicata* **80**: 307–310.
- 382 **Moles AT, Bonser SP, Poore AGB, Wallis IR, Foley WJ. 2011a.** Assessing the evidence  
383 for latitudinal gradients in plant defence and herbivory: Latitudinal gradients in herbivory and  
384 defence. *Functional Ecology* **25**: 380–388.
- 385 **Moles AT, Wallis IR, Foley WJ, Warton DI, Stegen JC, Bisigato AJ, Cella-Pizarro L,**  
386 **Clark CJ, Cohen PS, Cornwell WK, et al. 2011b.** Putting plant resistance traits on the map:  
387 a test of the idea that plants are better defended at lower latitudes. *New Phytologist* **191**: 777–  
388 788.
- 389 **Müller C, Martens N. 2005.** Testing Predictions of the ‘Evolution of Increased Competitive  
390 Ability’ Hypothesis for an Invasive Crucifer. *Evolutionary Ecology* **19**: 533–550.
- 391 **Nieminen M, Suomi J, Van Nouhuys S, Sauri P, Riekkola M-L. 2003.** Effect of Iridoid  
392 Glycoside Content on Oviposition Host Plant Choice and Parasitism in a Specialist  
393 Herbivore. *Journal of Chemical Ecology* **29**: 823–844.
- 394 **Novotny V, Basset Y, Miller SE, Weiblen GD, Bremer B, Cizek L, Drozd P. 2002.** Low  
395 host specificity of herbivorous insects in a tropical forest. *Nature* **416**: 841–844.
- 396 **Pennings SC, Zimmer M, Dias N, Sprung M, Davé N, Ho C-K, Kunza A, McFarlin C,**  
397 **Mews M, Pfaunder A, et al. 2007.** Latitudinal variation in plant-herbivore interactions in  
398 European salt marshes. *Oikos* **116**: 543–549.
- 399 **Rausher MD, Simms EL. 1989.** The evolution of resistance to herbivory in *Ipomoea*  
400 *purpurea*. I. Attempts to detect selection. *Evolution* **43**: 563–572.
- 401 **Rhoades DF. 1979.** Evolution of plant chemical defense against herbivores. *Herbivores:*  
402 *their interaction with secondary plant metabolites*: 3–54.
- 403 **Skogsmyr I, Fagerström T. 1992.** The Cost of Anti-Herbivory Defence: An Evaluation of  
404 Some Ecological and Physiological Factors. *Oikos* **64**: 451–457.
- 405 **Vilà M, Maron JL, Marco L. 2005.** Evidence for the enemy release hypothesis in  
406 *Hypericum perforatum*. *Oecologia* **142**: 474–479.
- 407 **Vrieling K, de Vos H, van Wijk CAM. 1993.** Genetic analysis of the concentrations of  
408 pyrrolizidine alkaloids in *Senecio jacobaea*. *Phytochemistry* **32**: 1141–1144.

- 409 **Wolfe LM. 2002.** Why Alien Invaders Succeed: Support for the Escape-from-Enemy  
410 Hypothesis. *The American Naturalist* **160**: 705–711.
- 411 **Wolfe LM, Elzinga JA, Biere A. 2004.** Increased susceptibility to enemies following  
412 introduction in the invasive plant *Silene latifolia*: Decreased resistance in an invasive plant.  
413 *Ecology Letters* **7**: 813–820.
- 414 **Zhang Z, Pan X, Blumenthal D, van Kleunen M, Liu M, Li B. 2018.** Contrasting effects  
415 of specialist and generalist herbivores on resistance evolution in invasive plants. *Ecology* **99**:  
416 866–875.
- 417 **Züst T, Mou S, Agrawal AA. 2018.** What doesn't kill you makes you stronger: The burdens  
418 and benefits of toxin sequestration in a milkweed aphid (A Biere, Ed.). *Functional Ecology*  
419 **32**: 1972–1981.
- 420



421 **Figure 1**

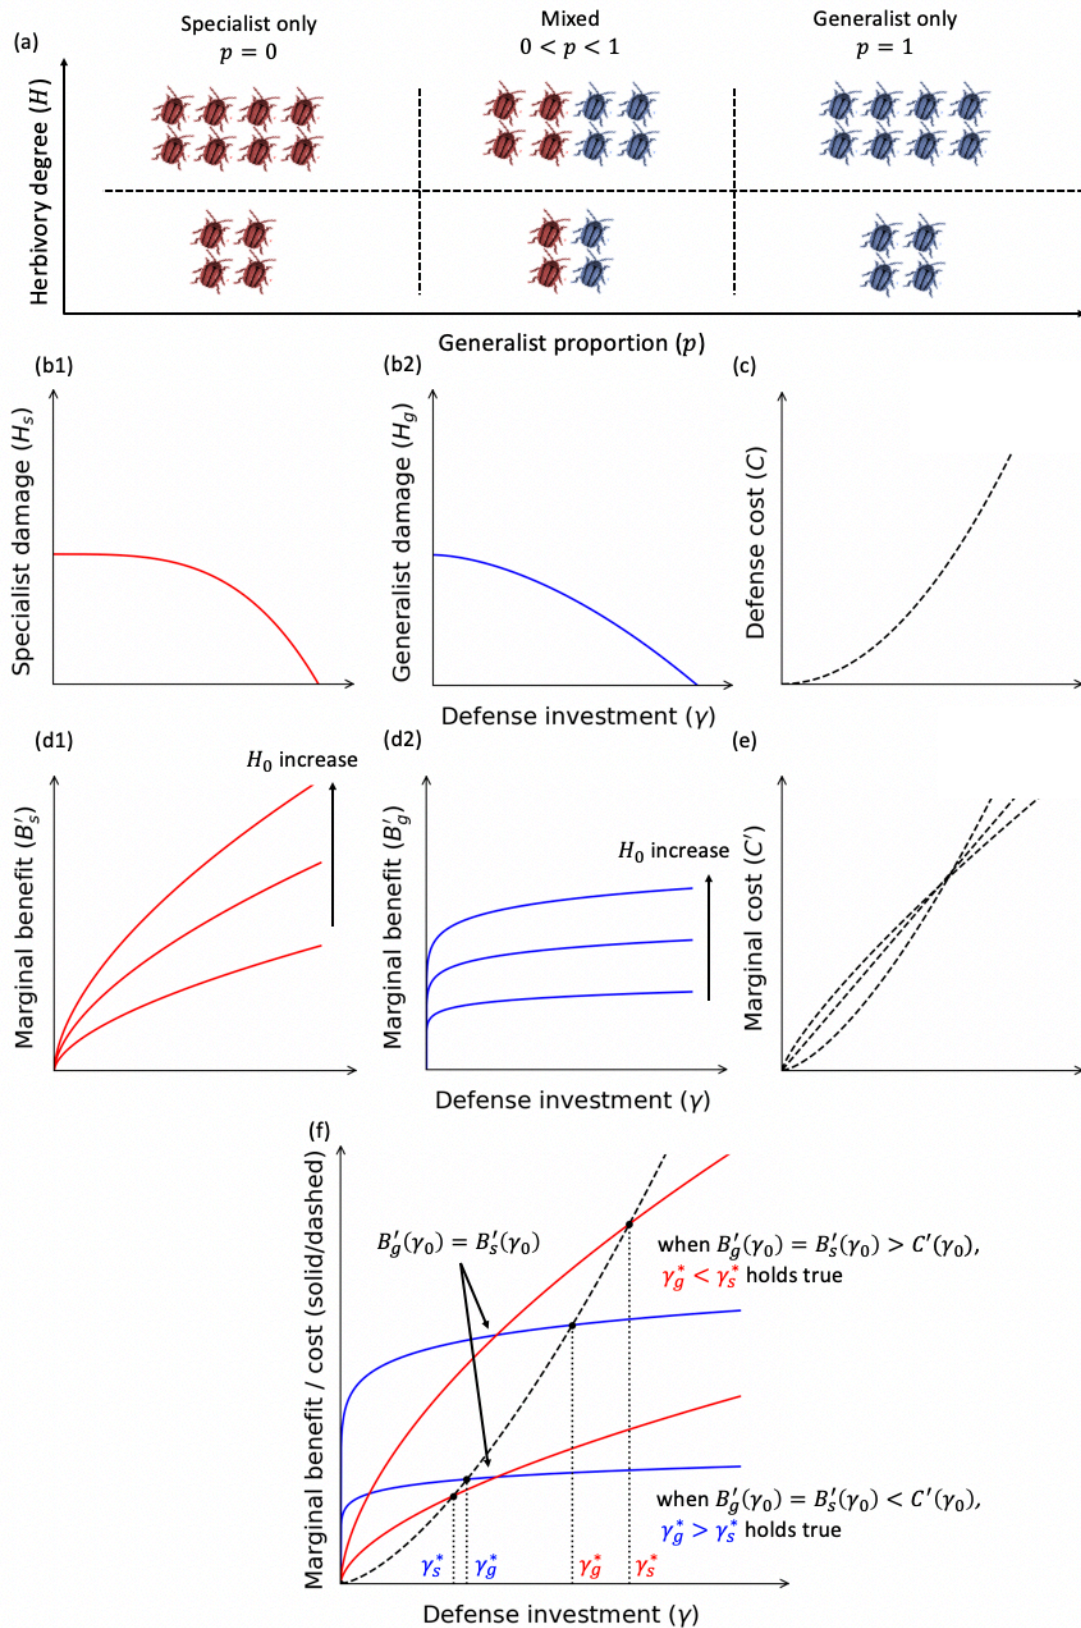

422

423 **Figure 1.** Conceptual framework for explaining the possible interactive effect between  
424 herbivory degree ( $H$ ) and the ratio of generalist to specialist ( $p$ , generalist proportion) on  
425 plant defense investment. **(a)** Graphical illustration of variation in  $H$  and  $p$ . **(b) Empirical**  
426 **assumption 1:** specialist herbivores are less impacted by a given plant defense compared  
427 with generalist herbivores (Cornel and Hawkins 2003; Ali and Agrawal 2012; see also our  
428 experiment data in supplementary materials). **(b1)** Specialist damage ( $H_s$ ) decrease less than  
429 linearly with defense investment ( $H_s = H_0(1 - \gamma^a)$ ,  $a > 1$ ). **(b2)** Generalist damage ( $H_g$ )  
430 decrease steeper than  $H_s$  ( $H_g = H_0(1 - \gamma^b)$ ,  $b \geq 1$ ,  $b < a$ , see supplementary materials for  
431 the case where  $b = 1$ ). **(c) Empirical assumption 2:** allocation cost ( $C$ ) increase with  
432 defense investment convexly ( $C = \gamma^b$ ,  $b > 1$ ) (Fagerstrom 1989; Fornoni et al. 2004). **(d)**  
433 Marginal benefit ( $B'_x = -H'_x = -\frac{dH_x}{d\gamma}$ ,  $x = \{g, s\}$ ) of defense investment ( $\gamma$ ) increase with  
434 increasing  $H_0$ . **(d1)** Marginal benefit against specialists is  $B'_s = aH_0\gamma^{a-1}$ . **(d2)** Marginal  
435 benefit against generalists is  $B'_g = H_0$ . **(e)** Marginal cost of defense could be convex, concave  
436 or linear given  $b > 1$ :  $C = b\gamma^{b-1}$ . **(f)** Conditions of interactive effect of herbivory degree  
437 ( $H_0$ ) and generalist proportion ( $p$ ) on optimal defense investment ( $\gamma^*$ ). If  $B'_s(\gamma) < C'(\gamma)$   
438 holds true given  $\gamma$  satisfies  $B'_s(\gamma) = B'_g(\gamma)$ , which may occur when herbivory degree ( $H_0$ ) is  
439 relatively low, the optimal defense investment against generalist ( $\gamma_g^*$ ) is greater than that of  
440 specialist ( $\gamma_s^*$ ). Thus, defense investment should increase with increasing generalist  
441 proportion. If  $B'_s(\gamma) > C'(\gamma)$  holds true given  $\gamma$  satisfies  $B'_s(\gamma) = B'_g(\gamma)$ , which may occur  
442 when herbivory degree ( $H_0$ ) is relatively high the optimal defense investment against  
443 generalist ( $\gamma_g^*$ ) is smaller than that of specialist ( $\gamma_s^*$ ). Thus, defense investment should  
444 decrease with increasing generalist proportion.

445 **Figure 2**

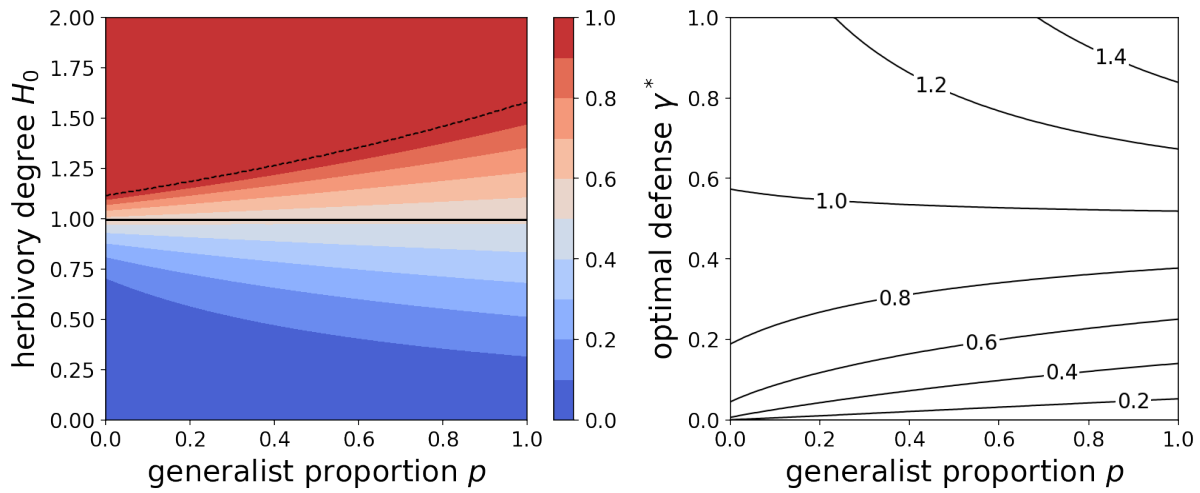

446

447

448 **Figure 2.** Interactive effect of herbivory degree and generalist proportion on the optimal  
449 levels of plant defense. **Left**, contour plot of optimal defense levels. Color indicates the  
450 optimal defense level  $\gamma^*$ . Solid line is the threshold dividing herbivory degree into low  
451 (below the line) and high (above the line). Dashed line indicates that defense level reaches its  
452 maximal value ( $\gamma^* = 1$ ) beyond this line. **Right**, cross sections of contour plot on the left at  
453 specific  $H_0$  values. Numbers on the lines indicate the corresponding  $H_0$  values. This pair of  
454 plots corresponds to the following parameter setting:  $a = 1.2, b = 1.7, c = 1.7, s_g = 1, s_s =$   
455  $1, k = 0, C_{max} = 1$ .

456 **Figure 3**

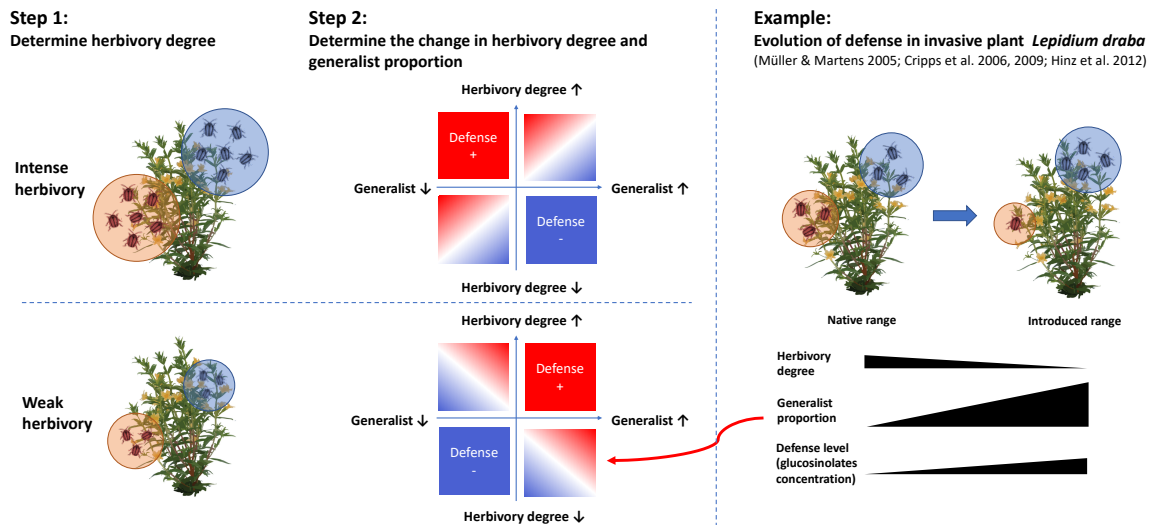

457

458

459 **Figure 3.** Practical guide to applying interactive effect into predicting the plant defense  
 460 evolution. In step one, herbivory degree is divided into weak or intense according to  
 461 herbivory threshold shown in figure 2. In step two, direction and strength of selection  
 462 gradient on defense is predicted using the change in herbivory degree and generalist  
 463 proportion. Red color in quadrat plot indicates plant evolves higher level of defense, and blue  
 464 color indicates lower level of plant defense. A mixture of red and blue color implies that plant  
 465 may evolve either higher or lower defense according to relative importance of herbivory  
 466 degree and generalist proportion (see Example on the right)

467 **Table 1.** Examples of applications and cases supporting our interactive model.

| Scenario                          | Herbivory degree                     | Change in herbivory degree | Change in generalist proportion | Predicted change in defense level        | Previous theories | Cases                                                                                                                   |
|-----------------------------------|--------------------------------------|----------------------------|---------------------------------|------------------------------------------|-------------------|-------------------------------------------------------------------------------------------------------------------------|
| Plant invasions <sup>1</sup>      | High                                 | Decrease                   | Increase                        | Decrease                                 | EICA              | <i>Hypericum perforatum</i> (Maron <i>et al.</i> , 2004; Vilà <i>et al.</i> , 2005)                                     |
|                                   | Low                                  | Decrease                   | Increase sharply                | Increase                                 | SDH               | <i>Lepidium draba</i> (Müller & Martens, 2005; Cripps <i>et al.</i> , 2006, 2009; Hinz <i>et al.</i> , 2012)            |
|                                   |                                      | Decrease sharply           | Increase                        | Decrease                                 | EICA              | <i>Silene latifolia</i> (Wolfe, 2002; Wolfe <i>et al.</i> , 2004; Blair & Wolfe, 2004; Elzinga & Bernasconi, 2009)      |
| Latitudinal patterns <sup>2</sup> | High                                 | Decrease                   | Decrease sharply                | Increase                                 | -                 | <i>Oenothera biennis</i> (Anstett <i>et al.</i> , 2014)                                                                 |
|                                   |                                      | Decrease sharply           | Decrease                        | Decrease                                 | LHDH              | <i>Atriplex spp.</i> , <i>Juncus spp.</i> , <i>Limonium spp.</i> , <i>Spartina spp.</i> (Pennings <i>et al.</i> , 2007) |
|                                   | Low                                  | Decrease                   | Decrease                        | Decrease                                 | LHDH              | Cross species (Coley & Aide, 1991); <i>Acacia falcata</i> (Andrew & Hughes, 2005)(Coley & Aide, 1991)                   |
|                                   | From high to low, crossing threshold | Decrease                   | Decrease sharply                | Increase then decrease, unimodal pattern | -                 | <i>Alternanthera philoxeroides</i> (our unpublished data)                                                               |

468 <sup>1</sup> Here we assume the change in herbivory degree and generalist proportion to be the change from native to introduced range following invasion.

469 <sup>2</sup> Similarly, we assume the described changes and patterns to be from lower latitude to higher latitude.
